# Supplementary material for: Predicting the 10-year risk of cataract surgery using machine learning techniques on questionnaire data: findings from the 45 and Up Study
Source: PubMed Central journal article supplement — Br J Ophthalmol. 2021 May 26;106(11):1503–7. doi: 10.1136/bjophthalmol-2020-318609 (PMC9606508; doi:10.1136/bjophthalmol-2020-318609), 2021-05-26

**Supplementary Table 1** Baseline characteristics of eligible participants grouped by history of cataract surgery during follow-up period.

| Item                               | Total          | Non-cataract at follow-up | Cataract surgery at follow-up | p <sup>a</sup>   |
|------------------------------------|----------------|---------------------------|-------------------------------|------------------|
| Number of participants             | 207573         | 184000                    | 23573                         | -                |
| <b>Demographic characteristics</b> |                |                           |                               |                  |
| Age group                          |                |                           |                               | <b>&lt;0.001</b> |
| 45-54                              | 69527 (33.5%)  | 68038 (37.0%)             | 1489 (6.3%)                   |                  |
| 55-64                              | 70323 (33.9%)  | 64387 (35.0%)             | 5936 (25.2%)                  |                  |
| 65-74                              | 42334 (20.4%)  | 32567 (17.7%)             | 9767 (41.4%)                  |                  |
| ≥75                                | 25389 (12.2%)  | 19008 (10.3%)             | 6381 (27.1%)                  |                  |
| Gender                             |                |                           |                               | 0.652            |
| Male                               | 97332 (46.9%)  | 86311 (46.9%)             | 11021 (46.8%)                 |                  |
| Female                             | 110241 (53.1%) | 97689 (53.1%)             | 12552 (53.2%)                 |                  |
| Income categories (AUD)            |                |                           |                               | <b>&lt;0.001</b> |
| <20000                             | 33143 (16.0%)  | 28523 (15.5%)             | 4620 (19.6%)                  |                  |
| ≥20000-39999                       | 34956 (16.8%)  | 29807 (16.2%)             | 5149 (21.8%)                  |                  |
| ≥40000-69999                       | 39479 (19.0%)  | 35409 (19.2%)             | 4070 (17.3%)                  |                  |
| ≥70000                             | 56319 (27.1%)  | 52545 (28.6%)             | 3774 (16.0%)                  |                  |
| Missing                            | 43676 (21.0%)  | 37716 (20.5%)             | 5960 (25.3%)                  |                  |
| Education level                    |                |                           |                               | <b>&lt;0.001</b> |
| <10 years                          | 21163 (10.2%)  | 18553 (10.1%)             | 2610 (11.1%)                  |                  |
| High school/TAFE                   | 130931 (63.1%) | 1155492<br>(62.8%)        | 15439 (65.5%)                 |                  |
| University or higher               | 52183 (25.1%)  | 47069 (25.6%)             | 5114 (21.7%)                  |                  |
| Missing                            | 3296 (1.6%)    | 2886 (1.6%)               | 410 (1.7%)                    |                  |
| Country of birth                   |                |                           |                               | 0.258            |
| Australia                          | 155537 (74.9%) | 137799 (74.9%)            | 17738 (75.2%)                 |                  |
| Others                             | 50412 (24.3%)  | 44772 (24.3%)             | 5640 (23.9%)                  |                  |
| Missing                            | 1624 (0.8%)    | 1429 (0.8%)               | 195 (0.8%)                    |                  |
| Residential rurality               |                |                           |                               | <b>&lt;0.001</b> |
| Major cities                       | 107427 (51.8%) | 94602 (51.4%)             | 12825 (54.4%)                 |                  |
| Inner regional                     | 72629 (35.0%)  | 64613 (35.1%)             | 8016 (34.0%)                  |                  |
| Outer regional                     | 21469 (10.3%)  | 19331 (10.5%)             | 2138 (9.1%)                   |                  |
| Remote                             | 2041 (1.0%)    | 1856 (1.0%)               | 185 (0.8%)                    |                  |
| Missing                            | 4007 (1.9%)    | 3598 (2.0%)               | 409 (1.7%)                    |                  |
| Health insurance                   |                |                           |                               | <b>&lt;0.001</b> |
| Private with extras                | 93980 (45.3%)  | 83048 (45.1%)             | 10932 (46.4%)                 |                  |
| Private without extras             | 24608 (11.9%)  | 21387 (11.6%)             | 3221 (13.7%)                  |                  |
| Veterans' Affairs card             | 3365 (1.6%)    | 3227 (1.8%)               | 138 (0.6%)                    |                  |
| Health care concession             | 47751 (23.0%)  | 40463 (22.0%)             | 7288 (30.9%)                  |                  |
| None of the above                  | 33995 (16.4%)  | 32374 (17.6%)             | 1621 (6.9%)                   |                  |

|                                            |                |                |               |        |
|--------------------------------------------|----------------|----------------|---------------|--------|
| <i>Missing</i>                             | 3874 (1.9%)    | 3501 (1.9%)    | 373 (1.6%)    |        |
| Marital status                             |                |                |               | 0.157  |
| <i>Married/Partner</i>                     | 159477 (76.8%) | 141452 (76.9%) | 18025 (76.5%) |        |
| <i>Single/Widowed/Divorced</i>             | 48096 (23.2%)  | 42548 (23.1%)  | 5548 (23.5%)  |        |
| Social economic status (SES)               |                |                |               | <0.001 |
| <i>1<sup>st</sup> quintile</i>             | 40717 (19.6%)  | 36480 (19.8%)  | 4237 (18.0%)  |        |
| <i>2<sup>nd</sup> quintile</i>             | 41912 (20.2%)  | 37156 (20.2%)  | 4756 (20.2%)  |        |
| <i>3<sup>rd</sup> quintile</i>             | 37771 (18.2%)  | 33385 (18.1%)  | 4386 (18.6%)  |        |
| <i>4<sup>th</sup> quintile</i>             | 34869 (16.8%)  | 30966 (16.8%)  | 3903 (16.6%)  |        |
| <i>5<sup>th</sup> quintile</i>             | 46648 (22.5%)  | 41022 (22.3%)  | 5626 (23.9%)  |        |
| <i>Missing</i>                             | 5656 (2.7%)    | 4991 (2.7%)    | 665 (2.8%)    |        |
| Body mass index                            |                |                |               | <0.001 |
| <i>15-18.4 kg/m<sup>2</sup></i>            | 2379 (1.1%)    | 2079 (1.1%)    | 300 (1.3%)    |        |
| <i>18.5-24.9 kg/m<sup>2</sup></i>          | 73767 (35.5%)  | 65138 (35.4%)  | 8629 (36.6%)  |        |
| <i>25-29.9 kg/m<sup>2</sup></i>            | 77461 (37.3%)  | 68481 (37.2%)  | 8980 (38.1%)  |        |
| <i>≥30 kg/m<sup>2</sup></i>                | 40574 (19.5%)  | 36444 (19.8%)  | 4130 (17.5%)  |        |
| <i>Missing</i>                             | 13392 (6.5%)   | 11858 (6.4%)   | 1534 (6.5%)   |        |
| <b>Chronic diseases and family history</b> |                |                |               |        |
| Diabetes at baseline                       |                |                |               | <0.001 |
| <i>No</i>                                  | 192996 (93.0%) | 171691 (93.3%) | 21305 (90.4%) |        |
| <i>Yes</i>                                 | 14577 (7.0%)   | 12309 (6.7%)   | 2268 (9.6%)   |        |
| Hypertension at baseline                   |                |                |               | <0.001 |
| <i>No</i>                                  | 141208 (68.0%) | 127574 (69.3%) | 13634 (57.8%) |        |
| <i>Yes</i>                                 | 66365 (32.0%)  | 56426 (30.7%)  | 9939 (42.2%)  |        |
| Dyslipidemia at baseline                   |                |                |               | <0.001 |
| <i>No</i>                                  | 179966 (86.7%) | 160707 (87.3%) | 19259 (81.7%) |        |
| <i>Yes</i>                                 | 27607 (13.3%)  | 23293 (12.7%)  | 4314 (18.3%)  |        |
| CVD at baseline                            |                |                |               | <0.001 |
| <i>No</i>                                  | 185249 (89.2%) | 165671 (90.0%) | 19578 (83.1%) |        |
| <i>Yes</i>                                 | 22324 (10.8%)  | 18329 (10.0%)  | 3995 (16.9%)  |        |
| Cancer at baseline                         |                |                |               | <0.001 |
| <i>No</i>                                  | 178197 (85.8%) | 159122 (86.5%) | 19075 (80.9%) |        |
| <i>Yes</i>                                 | 29376 (14.2%)  | 24878 (13.5%)  | 4498 (19.1%)  |        |
| Parkinson's disease at baseline            |                |                |               | <0.001 |
| <i>No</i>                                  | 206695 (99.6%) | 183272 (99.6%) | 23423 (99.4%) |        |
| <i>Yes</i>                                 | 878 (0.4%)     | 728 (0.4%)     | 150 (0.6%)    |        |
| Anxiety at baseline                        |                |                |               | <0.001 |
| <i>No</i>                                  | 162797 (78.4%) | 144606 (78.6%) | 18191 (77.2%) |        |
| <i>Yes</i>                                 | 15537 (7.5%)   | 14061 (7.6%)   | 1476 (6.3%)   |        |
| <i>Missing</i>                             | 29239 (14.1%)  | 25333 (13.8%)  | 3906 (16.6%)  |        |
| Family history of diabetes                 |                |                |               | <0.001 |
| <i>No</i>                                  | 160629 (77.4%) | 141922 (77.1%) | 18707 (79.4%) |        |

|                                |                |                |               |                  |
|--------------------------------|----------------|----------------|---------------|------------------|
| <i>Yes</i>                     | 46934 (22.6%)  | 42069 (22.9%)  | 4865 (20.6%)  |                  |
| <i>Missing</i>                 | 10 (0.0%)      | 9 (0.0%)       | 1 (0.0%)      |                  |
| Family history of hypertension |                |                |               | <b>&lt;0.001</b> |
| <i>No</i>                      | 102735 (49.5%) | 90060 (48.9%)  | 12728 (54.0%) |                  |
| <i>Yes</i>                     | 104824 (50.5%) | 93929 (51.0%)  | 10842 (46.0%) |                  |
| <i>Missing</i>                 | 14 (0.0%)      | 11 (0.0%)      | 3 (0.0%)      |                  |
| Family history of CVD          |                |                |               | <b>&lt;0.001</b> |
| <i>No</i>                      | 90690 (43.7%)  | 81565 (44.3%)  | 9125 (38.7%)  |                  |
| <i>Yes</i>                     | 116872 (56.3%) | 102425 (55.7%) | 14447 (61.3%) |                  |
| <i>Missing</i>                 | 11 (0.0%)      | 10 (0.0%)      | 1 (0.0%)      |                  |
| Family history of stroke       |                |                |               | <b>&lt;0.001</b> |
| <i>No</i>                      | 155383 (74.9%) | 138521 (75.3%) | 16862 (71.5%) |                  |
| <i>Yes</i>                     | 52178 (25.1%)  | 45468 (24.7%)  | 6710 (28.5%)  |                  |
| <i>Missing</i>                 | 12 (0.0%)      | 11 (0.0%)      | 1 (0.0%)      |                  |
| <b>Life style indicators</b>   |                |                |               |                  |
| Smoking                        |                |                |               | <b>&lt;0.001</b> |
| <i>Never smoked</i>            | 120411 (58.0%) | 106364 (57.8%) | 14047 (59.6%) |                  |
| <i>Ex-smoker</i>               | 72231 (34.8%)  | 63574 (34.6%)  | 8657 (36.7%)  |                  |
| <i>Current smoker</i>          | 14850 (7.2%)   | 13994 (7.6%)   | 856 (3.6%)    |                  |
| <i>Missing</i>                 | 81 (0.0%)      | 68 (0.0%)      | 13 (0.1%)     |                  |
| Alcohol drinks                 |                |                |               | 0.611            |
| <i>0</i>                       | 62591 (30.2%)  | 55384 (30.1%)  | 7207 (30.6%)  |                  |
| <i>1-4 drinks/week</i>         | 42539 (20.5%)  | 38083 (20.7%)  | 4456 (18.9%)  |                  |
| <i>5-7 drinks/week</i>         | 30641 (14.8%)  | 26857 (14.6%)  | 3784 (16.1%)  |                  |
| <i>7-14 drinks/week</i>        | 37970 (18.3%)  | 33659 (18.3%)  | 4311 (18.3%)  |                  |
| <i>≥15 drinks/week</i>         | 30538 (14.7%)  | 27173 (14.8%)  | 3365 (14.3%)  |                  |
| <i>Missing</i>                 | 3294 (1.6%)    | 2844 (1.5%)    | 450 (1.9%)    |                  |
| Physical activities            |                |                |               | 0.911            |
| <i>0-4 sessions/week</i>       | 34254 (16.5%)  | 30613 (16.6%)  | 3641 (15.4%)  |                  |
| <i>5-9 sessions/week</i>       | 60496 (29.1%)  | 53483 (29.1%)  | 7013 (29.8%)  |                  |
| <i>10-14 sessions/week</i>     | 50494 (24.3%)  | 44309 (24.1%)  | 6185 (26.2%)  |                  |
| <i>≥15 sessions/week</i>       | 54746 (26.4%)  | 48917 (26.6%)  | 5829 (24.7%)  |                  |
| <i>Missing</i>                 | 7583 (3.7%)    | 6678 (3.6%)    | 905 (3.8%)    |                  |
| Sleeping time                  |                |                |               | <b>&lt;0.001</b> |
| <i>&lt;7 hours/day</i>         | 31005 (14.9%)  | 27624 (15.0%)  | 3381 (14.3%)  |                  |
| <i>≥7-9 hours/day</i>          | 158514 (76.4%) | 140821 (76.5%) | 17693 (75.1%) |                  |
| <i>≥9 hours/day</i>            | 12150 (5.9%)   | 10334 (5.6%)   | 1816 (7.7%)   |                  |
| <i>Missing</i>                 | 5904 (2.8%)    | 5221 (2.8%)    | 683 (2.9%)    |                  |
| Sitting time                   |                |                |               | <b>&lt;0.001</b> |
| <i>&lt;8 hours/day</i>         | 145348 (70.0%) | 127999 (69.6%) | 17349 (73.6%) |                  |
| <i>≥8 hours/day</i>            | 46383 (22.3%)  | 42304 (23.0%)  | 4079 (17.3%)  |                  |
| <i>Missing</i>                 | 15842 (7.6%)   | 13697 (7.4%)   | 2145 (9.1%)   |                  |
| <b>Dietary indicators</b>      |                |                |               |                  |

|                                  |                |                |               |                  |
|----------------------------------|----------------|----------------|---------------|------------------|
| Vegetable intakes                |                |                |               | <b>&lt;0.001</b> |
| <5 serving/day                   | 137343 (66.2%) | 122626 (66.6%) | 14717 (62.4%) |                  |
| ≥5 servings/day                  | 64811 (31.2%)  | 56574 (30.7%)  | 8237 (34.9%)  |                  |
| Missing                          | 5419 (2.6%)    | 4800 (2.6%)    | 619 (2.6%)    |                  |
| Fruit intakes                    |                |                |               | <b>&lt;0.001</b> |
| <2 serving/day                   | 79881 (38.5%)  | 71880 (39.1%)  | 8001 (33.9%)  |                  |
| ≥2 servings/day                  | 116701 (56.2%) | 102339 (55.6%) | 14362 (60.9%) |                  |
| Missing                          | 10991 (5.3%)   | 9781 (5.3%)    | 1210 (5.1%)   |                  |
| Breakfast cereal intakes         |                |                |               | <b>&lt;0.001</b> |
| Non-high fiber                   | 30587 (14.7%)  | 26864 (14.6%)  | 3723 (15.8%)  |                  |
| High fiber                       | 138601 (66.8%) | 122576 (66.6%) | 16034 (68.0%) |                  |
| Missing                          | 38376 (18.5%)  | 34560 (18.8%)  | 3816 (16.2%)  |                  |
| Milk intakes                     |                |                |               | <b>&lt;0.001</b> |
| None                             | 10493 (5.1%)   | 9334 (5.1%)    | 1159 (4.9%)   |                  |
| Skimmed fat/reduced fat/soy milk | 125262 (60.3%) | 110091 (59.8%) | 15171 (64.4%) |                  |
| Whole milk                       | 67136 (32.3%)  | 60434 (32.8%)  | 6702 (28.4%)  |                  |
| Missing                          | 4682 (2.3%)    | 4141 (2.3%)    | 541 (2.3%)    |                  |
| Red meat intakes                 |                |                |               | <b>&lt;0.001</b> |
| 0 or 1 serving per week          | 25567 (12.3%)  | 23114 (12.6%)  | 2453 (10.4%)  |                  |
| 2 servings per week              | 35771 (17.2%)  | 32135 (17.5%)  | 3636 (15.4%)  |                  |
| 3 servings per week              | 18907 (9.1%)   | 16884 (9.2%)   | 2023 (8.6%)   |                  |
| 4 servings per week              | 37460 (18.0%)  | 33224 (18.1%)  | 4236 (18.0%)  |                  |
| ≥5 servings per week             | 54363 (26.2%)  | 47796 (26.0%)  | 6567 (27.9%)  |                  |
| Missing                          | 35505 (17.1%)  | 30847 (16.8%)  | 4658 (19.8%)  |                  |
| Fish intakes                     |                |                |               | <b>&lt;0.001</b> |
| 1 <sup>st</sup> quartile         | 14856 (7.2%)   | 13588 (7.4%)   | 1268 (5.4%)   |                  |
| 2 <sup>nd</sup> quartile         | 82800 (39.9%)  | 73912 (40.2%)  | 8888 (37.7%)  |                  |
| 3 <sup>rd</sup> quartile         | 30766 (14.8%)  | 26800 (14.6%)  | 3966 (16.8%)  |                  |
| 4 <sup>th</sup> quartile         | 66957 (32.3%)  | 58904 (32.0%)  | 8053 (34.2%)  |                  |
| Missing                          | 12194 (5.9%)   | 10796 (5.9%)   | 1398 (5.9%)   |                  |
| Cheese intakes                   |                |                |               | <b>&lt;0.001</b> |
| 1 <sup>st</sup> quintile         | 14477 (7.0%)   | 12964 (7.0%)   | 1513 (6.4%)   |                  |
| 2 <sup>nd</sup> quintile         | 46570 (22.4%)  | 41481 (22.5%)  | 5089 (21.6%)  |                  |
| 3 <sup>rd</sup> quintile         | 48117 (23.2%)  | 42876 (23.3%)  | 5241 (22.2%)  |                  |
| 4 <sup>th</sup> quintile         | 27141 (13.1%)  | 24011 (13.0%)  | 3130 (13.3%)  |                  |
| 5 <sup>th</sup> quintile         | 57744 (27.8%)  | 50887 (27.7%)  | 6857 (29.1%)  |                  |
| Missing                          | 13524 (6.5%)   | 11781 (6.4%)   | 1743 (7.4%)   |                  |
| Self-rated health                |                |                |               |                  |
| Self-rated health status         |                |                |               | <b>&lt;0.001</b> |
| Excellent                        | 35900 (17.3%)  | 32509 (17.7%)  | 3391 (14.4%)  |                  |
| Very good                        | 82525 (39.8%)  | 73005 (39.7%)  | 9520 (40.4%)  |                  |

|                                              |                |               |               |                  |
|----------------------------------------------|----------------|---------------|---------------|------------------|
| <i>Good</i>                                  | 64499 (31.1%)  | 56613 (30.8%) | 7886 (33.5%)  |                  |
| <i>Fair</i>                                  | 15397 (7.4%)   | 13683 (7.4%)  | 1714 (7.3%)   |                  |
| <i>Poor</i>                                  | 1550 (0.7%)    | 1431 (0.8%)   | 119 (0.5%)    |                  |
| <i>Missing</i>                               | 7702 (3.7%)    | 6759 (3.7%)   | 943 (4.0%)    |                  |
| Self-rated quality of life                   |                |               |               | <b>&lt;0.001</b> |
| <i>Excellent</i>                             | 35128 (16.9%)  | 31830 (17.3%) | 3298 (14.0%)  |                  |
| <i>Very good</i>                             | 80775 (38.9%)  | 71520 (38.9%) | 9255 (39.3%)  |                  |
| <i>Good</i>                                  | 62609 (30.2%)  | 54992 (29.9%) | 7617 (32.3%)  |                  |
| <i>Fair</i>                                  | 14621 (7.0%)   | 12986 (7.1%)  | 1635 (6.9%)   |                  |
| <i>Poor</i>                                  | 1408 (0.7%)    | 1303 (0.7%)   | 105 (0.4%)    |                  |
| <i>Missing</i>                               | 11577 (5.6%)   | 10111 (5.5%)  | 1466 (6.2%)   |                  |
| <b>Social support/Psychological distress</b> |                |               |               |                  |
| Social interaction                           |                |               |               | <b>&lt;0.001</b> |
| <i>Low</i>                                   | 31907 (15.4%)  | 29166 (15.9%) | 2741 (11.6%)  |                  |
| <i>Moderate</i>                              | 110543 (53.3%) | 99079 (53.8%) | 11464 (48.6%) |                  |
| <i>High</i>                                  | 45758 (22.0%)  | 38789 (21.1%) | 6969 (29.6%)  |                  |
| <i>Missing</i>                               | 19365 (9.3%)   | 16966 (9.2%)  | 2399 (10.2%)  |                  |
| Depression                                   |                |               |               | <b>&lt;0.001</b> |
| <i>None</i>                                  | 83911 (40.4%)  | 73156 (39.8%) | 10755 (45.6%) |                  |
| <i>Mild</i>                                  | 67796 (32.7%)  | 61024 (33.2%) | 6772 (28.7%)  |                  |
| <i>Moderate</i>                              | 26578 (12.8%)  | 24355 (13.2%) | 2223 (9.4%)   |                  |
| <i>High</i>                                  | 10347 (5.0%)   | 9632 (5.2%)   | 715 (3.0%)    |                  |
| <i>Missing</i>                               | 18941 (9.1%)   | 15833 (8.6%)  | 3108 (13.2%)  |                  |

<sup>a</sup>All P values were calculated using a t-test for continuous variables and the  $\chi^2$  test for categorical variables. Boldface indicates statistical significance, deemed as  $p < 0.05$ .

**Supplementary Table 2** Baseline characteristics of 207,573 participants by residency in the 45-and-up study.

| Item                                        | City (Training set) | Regional/rural areas (Validating set) | p <sup>a</sup>   |
|---------------------------------------------|---------------------|---------------------------------------|------------------|
| Number of participants                      | <b>107427</b>       | <b>100146</b>                         |                  |
| <b>Demographic characteristics</b>          |                     |                                       |                  |
| Gender                                      |                     |                                       | <b>&lt;0.001</b> |
| <i>Male</i>                                 | 51563(48.0%)        | 45769(45.7%)                          |                  |
| <i>Female</i>                               | 55864(52.0%)        | 54377(54.3%)                          |                  |
| Ancestry                                    |                     |                                       | 0.238            |
| <i>Australian</i>                           | 22495(20.9%)        | 27682(27.6%)                          |                  |
| <i>Europe</i>                               | 25642(23.9%)        | 19312(19.3%)                          |                  |
| <i>Asia</i>                                 | 4332(4.0%)          | 348(0.3%)                             |                  |
| <i>Mixture</i>                              | 7606(7.1%)          | 2543(2.5%)                            |                  |
| <i>Mixture</i>                              | 46230(43.0%)        | 49037(49.0%)                          |                  |
| <i>Missing</i>                              | 1122(1.0%)          | 1224(1.2%)                            |                  |
| Income categories                           |                     |                                       | <b>&lt;0.001</b> |
| <20000                                      | 15248(14.2%)        | 17895(17.9%)                          |                  |
| ≥20000-39999                                | 15248(14.2%)        | 19708(19.7%)                          |                  |
| ≥40000-69999                                | 19352(18.0%)        | 20127(20.1%)                          |                  |
| ≥70000                                      | 34628(32.2%)        | 21691(21.7%)                          |                  |
| <i>Missing</i>                              | 22951(21.4%)        | 20725(20.7%)                          |                  |
| Education level                             |                     |                                       | <b>&lt;0.001</b> |
| <10 years                                   | 9500(8.8%)          | 11663(11.6%)                          |                  |
| <i>High school/TAFE</i>                     | 64878(60.4%)        | 66053(66.0%)                          |                  |
| <i>University or higher</i>                 | 31353(29.2%)        | 20830(20.8%)                          |                  |
| <i>Missing</i>                              | 1696(1.6%)          | 1600(1.6%)                            |                  |
| Country of birth                            |                     |                                       | <b>&lt;0.001</b> |
| <i>Australia</i>                            | 72434(67.4%)        | 83103(83.0%)                          |                  |
| <i>Others</i>                               | 34142(31.8%)        | 16270(16.2%)                          |                  |
| <i>Missing</i>                              | 851(0.8%)           | 773(0.8%)                             |                  |
| Residential rurality                        |                     |                                       | 0.662            |
| <i>Major cities</i>                         | 107427(100%)        |                                       |                  |
| <i>Inner regional</i>                       |                     | 72629(72.5%)                          |                  |
| <i>Outer regional</i>                       |                     | 21469(21.4%)                          |                  |
| <i>Remote</i>                               |                     | 2041(2.0%)                            |                  |
| <i>Missing</i>                              |                     | 4007(4.0%)                            |                  |
| Health insurance                            |                     |                                       | <b>&lt;0.001</b> |
| <i>Private with extras</i>                  | 55097(51.3%)        | 38883(38.8%)                          |                  |
| <i>Private without extras</i>               | 12289(11.4%)        | 12319(12.3%)                          |                  |
| <i>Veterans' Affairs white or gold card</i> | 1914(1.8%)          | 1451(1.4%)                            |                  |
| <i>Health care concession</i>               | 21284(19.8%)        | 26467(26.4%)                          |                  |

|                                            |              |              |                  |
|--------------------------------------------|--------------|--------------|------------------|
| <i>None of the above</i>                   | 14916(13.9%) | 19079(19.1%) |                  |
| <i>Missing</i>                             | 1927(1.8%)   | 1947(1.9%)   |                  |
| Marital status                             |              |              | <b>&lt;0.001</b> |
| <i>Married/Partner</i>                     | 81046(75.4%) | 78431(78.3%) |                  |
| <i>Single/Widowed/Divorced</i>             | 26381(24.6%) | 21715(21.7%) |                  |
| Social economic status (SES)               |              |              | <b>&lt;0.001</b> |
| <i>1<sup>st</sup> quintile</i>             | 13085(12.2%) | 27632(27.6%) |                  |
| <i>2<sup>nd</sup> quintile</i>             | 15982(14.9%) | 25930(25.9%) |                  |
| <i>3<sup>rd</sup> quintile</i>             | 17299(16.1%) | 20472(20.4%) |                  |
| <i>4<sup>th</sup> quintile</i>             | 19847(18.5%) | 15022(15.0%) |                  |
| <i>5<sup>th</sup> quintile</i>             | 40548(37.7%) | 6100(6.1%)   |                  |
| <i>Missing</i>                             | 666(0.6%)    | 4990(5.0%)   |                  |
| Body mass index                            |              |              | <b>&lt;0.001</b> |
| <i>15-18.4 kg/m<sup>2</sup></i>            | 1286(1.2%)   | 1093(1.1%)   |                  |
| <i>18.5-24.9 kg/m<sup>2</sup></i>          | 39737(37.0%) | 34030(34.0%) |                  |
| <i>25-29.9 kg/m<sup>2</sup></i>            | 39793(37.0%) | 37668(37.6%) |                  |
| <i>≥30 kg/m<sup>2</sup></i>                | 20080(18.7%) | 20494(20.5%) |                  |
| <i>Missing</i>                             | 6531(6.1%)   | 6861(6.9%)   |                  |
| <b>Chronic diseases and family history</b> |              |              |                  |
| Diabetes at baseline                       |              |              | 0.204            |
| <i>No</i>                                  | 99809(92.9%) | 93187(93.1%) |                  |
| <i>Yes</i>                                 | 7618(7.1%)   | 6959(6.9%)   |                  |
| Hypertension at baseline                   |              |              | <b>0.001</b>     |
| <i>No</i>                                  | 73449(68.4%) | 67759(67.7%) |                  |
| <i>Yes</i>                                 | 33978(31.6%) | 32387(32.3%) |                  |
| Dyslipidemia at baseline                   |              |              | <b>&lt;0.001</b> |
| <i>No</i>                                  | 92429(86.0%) | 87537(87.4%) |                  |
| <i>Yes</i>                                 | 14998(14.0%) | 12609(12.6%) |                  |
| CVD at baseline                            |              |              | <b>0.001</b>     |
| <i>No</i>                                  | 95642(89.0%) | 89607(89.5%) |                  |
| <i>Yes</i>                                 | 11785(11.0%) | 10539(10.5%) |                  |
| Cancer at baseline                         |              |              | <b>0.002</b>     |
| <i>No</i>                                  | 92466(86.1%) | 85731(85.6%) |                  |
| <i>Yes</i>                                 | 14961(13.9%) | 14415(14.4%) |                  |
| Parkinson's disease at baseline            |              |              | 0.756            |
| <i>No</i>                                  | 107E3(99.6%) | 99727(99.6%) |                  |
| <i>Yes</i>                                 | 459(0.4%)    | 419(0.4%)    |                  |
| Anxiety at baseline                        |              |              | <b>&lt;0.001</b> |
| <i>No</i>                                  | 84567(78.7%) | 78230(78.1%) |                  |
| <i>Yes</i>                                 | 8081(7.5%)   | 7456(7.4%)   |                  |
| <i>Missing</i>                             | 14779(13.8%) | 14460(14.4%) |                  |
| Family history of diabetes                 |              |              | 0.145            |

|                                |              |              |                  |
|--------------------------------|--------------|--------------|------------------|
| <i>No</i>                      | 82993(77.3%) | 77636(77.5%) |                  |
| <i>Yes</i>                     | 24428(22.7%) | 22506(22.5%) |                  |
| <i>Missing</i>                 | 6(0.0%)      | 4(0.0%)      |                  |
| Family history of hypertension |              |              | <b>&lt;0.001</b> |
| <i>No</i>                      | 53616(49.9%) | 49172(49.1%) |                  |
| <i>Yes</i>                     | 53805(50.1%) | 50966(50.9%) |                  |
| <i>Missing</i>                 | 6(0.0%)      | 8(0.0%)      |                  |
| Family history of CVD          |              |              | <b>&lt;0.001</b> |
| <i>No</i>                      | 47630(44.3%) | 43060(43.0%) |                  |
| <i>Yes</i>                     | 59791(55.7%) | 57081(57.0%) |                  |
| <i>Missing</i>                 | 6(0.0%)      | 5(0.0%)      |                  |
| Family history of stroke       |              |              | 0.481            |
| <i>No</i>                      | 80347(74.8%) | 75036(74.9%) |                  |
| <i>Yes</i>                     | 27074(25.2%) | 25104(25.1%) |                  |
| <i>Missing</i>                 | 6(0.0%)      | 6(0.0%)      |                  |
| <b>Life style indicators</b>   |              |              |                  |
| Smoking                        |              |              | <b>&lt;0.001</b> |
| <i>Never smoked</i>            | 63899(59.5%) | 56512(56.4%) |                  |
| <i>Ex-smoker</i>               | 36306(33.8%) | 35925(35.9%) |                  |
| <i>Current smoker</i>          | 7186(6.7%)   | 7664(7.7%)   |                  |
| <i>Missing</i>                 | 36(0.0%)     | 45(0.0%)     |                  |
| Number of alcohol drinks       |              |              | <b>&lt;0.001</b> |
| <i>0</i>                       | 32785(30.5%) | 29806(29.8%) |                  |
| <i>1-4 drinks/week</i>         | 22688(21.1%) | 19851(19.8%) |                  |
| <i>5-7 drinks/week</i>         | 15851(14.8%) | 14790(14.8%) |                  |
| <i>7-14 drinks/week</i>        | 19489(18.1%) | 18481(18.5%) |                  |
| <i>≥15 drinks/week</i>         | 14670(13.7%) | 15868(15.8%) |                  |
| <i>Missing</i>                 | 1944(1.8%)   | 1350(1.3%)   |                  |
| Physical activities            |              |              | <b>&lt;0.001</b> |
| <i>0-4 sessions/week</i>       | 18689(17.4%) | 15565(15.5%) |                  |
| <i>5-9 sessions/week</i>       | 32128(29.9%) | 28368(28.3%) |                  |
| <i>10-14 sessions/week</i>     | 25904(24.1%) | 24590(24.6%) |                  |
| <i>≥15 sessions/week</i>       | 26978(25.1%) | 27768(27.7%) |                  |
| <i>Missing</i>                 | 3728(3.5%)   | 3855(3.8%)   |                  |
| Sleeping time                  |              |              | <b>&lt;0.001</b> |
| <i>&lt;7 hours/day</i>         | 17683(16.5%) | 13322(13.3%) |                  |
| <i>≥7-9 hours/day</i>          | 81145(75.5%) | 77369(77.3%) |                  |
| <i>≥9 hours/day</i>            | 5356(5.0%)   | 6794(6.8%)   |                  |
| <i>Missing</i>                 | 3243(3.0%)   | 2661(2.7%)   |                  |
| Sitting time                   |              |              | <b>&lt;0.001</b> |
| <i>&lt;8 hours/day</i>         | 71092(66.2%) | 74256(74.1%) |                  |
| <i>≥8 hours/day</i>            | 28109(26.2%) | 18274(18.2%) |                  |
| <i>Missing</i>                 | 8226(7.7%)   | 7616(7.6%)   |                  |



|                                  |              |              |                  |
|----------------------------------|--------------|--------------|------------------|
| <b>Dietary indicators</b>        |              |              |                  |
| Vegetable intakes                |              |              | <b>&lt;0.001</b> |
| <5 serving/day                   | 73446(68.4%) | 63897(63.8%) |                  |
| ≥5 servings/day                  | 30885(28.7%) | 33926(33.9%) |                  |
| Missing                          | 3096(2.9%)   | 2323(2.3%)   |                  |
| Fruit intakes                    |              |              | <b>&lt;0.001</b> |
| <2 serving/day                   | 40298(37.5%) | 39583(39.5%) |                  |
| ≥2 servings/day                  | 61326(57.1%) | 55375(55.3%) |                  |
| Missing                          | 5803(5.4%)   | 5188(5.2%)   |                  |
| Breakfast cereal intakes         |              |              | <b>0.003</b>     |
| Non-high fiber                   | 16102(15.0%) | 14485(14.5%) |                  |
| High fiber                       | 70823(65.9%) | 67787(67.7%) |                  |
| Missing                          | 20502(19.1%) | 17874(17.8%) |                  |
| Milk intakes                     |              |              | <b>&lt;0.001</b> |
| None                             | 5441(5.1%)   | 5052(5.0%)   |                  |
| Skimmed fat/reduced fat/soy milk | 66817(62.2%) | 58445(58.4%) |                  |
| Whole milk                       | 32636(30.4%) | 34500(34.4%) |                  |
| Missing                          | 2533(2.4%)   | 2149(2.1%)   |                  |
| Red meat intakes                 |              |              | <b>&lt;0.001</b> |
| 0 or 1 serving per week          | 5441(5.1%)   | 5052(5.0%)   |                  |
| 2 servings per week              | 66817(62.2%) | 58445(58.4%) |                  |
| 3 servings per week              | 32636(30.4%) | 34500(34.4%) |                  |
| 4 servings per week              | 2533(2.4%)   | 2149(2.1%)   |                  |
| Fish intakes                     |              |              | <b>&lt;0.001</b> |
| 1 <sup>st</sup> quartile         | 5441(5.1%)   | 5052(5.0%)   |                  |
| 2 <sup>nd</sup> quartile         | 66817(62.2%) | 58445(58.4%) |                  |
| 3 <sup>rd</sup> quartile         | 32636(30.4%) | 34500(34.4%) |                  |
| 4 <sup>th</sup> quartile         | 2533(2.4%)   | 2149(2.1%)   |                  |
| Cheese intakes                   |              |              | <b>&lt;0.001</b> |
| 1 <sup>st</sup> quartile         | 5441(5.1%)   | 5052(5.0%)   |                  |
| 2 <sup>nd</sup> quartile         | 66817(62.2%) | 58445(58.4%) |                  |
| 3 <sup>rd</sup> quartile         | 32636(30.4%) | 34500(34.4%) |                  |
| 4 <sup>th</sup> quartile         | 2533(2.4%)   | 2149(2.1%)   |                  |
| <b>Self-rated health</b>         |              |              | .                |
| Self-rated health status         |              |              | 0.188            |
| Excellent                        | 19117(17.8%) | 16783(16.8%) |                  |
| Very good                        | 41819(38.9%) | 40706(40.6%) |                  |
| Good                             | 33250(31.0%) | 31249(31.2%) |                  |
| Fair                             | 8153(7.6%)   | 7244(7.2%)   |                  |
| Poor                             | 884(0.8%)    | 666(0.7%)    |                  |
| Missing                          | 4204(3.9%)   | 3498(3.5%)   |                  |
| Self-rated quality of life       |              |              | 0.545            |

|                                              |              |              |                  |
|----------------------------------------------|--------------|--------------|------------------|
| <i>Excellent</i>                             | 18706(17.4%) | 16422(16.4%) |                  |
| <i>Very good</i>                             | 40984(38.2%) | 39791(39.7%) |                  |
| <i>Good</i>                                  | 32310(30.1%) | 30299(30.3%) |                  |
| <i>Fair</i>                                  | 7750(7.2%)   | 6871(6.9%)   |                  |
| <i>Poor</i>                                  | 798(0.7%)    | 610(0.6%)    |                  |
| <i>Missing</i>                               | 6123(5.7%)   | 5454(5.4%)   |                  |
| <b>Social support/Psychological distress</b> |              |              |                  |
| Depression                                   |              |              | <b>0.041</b>     |
| <i>None</i>                                  | 43083(40.1%) | 40828(40.8%) |                  |
| <i>Mild</i>                                  | 35348(32.9%) | 32448(32.4%) |                  |
| <i>Moderate</i>                              | 13928(13.0%) | 12650(12.6%) |                  |
| <i>High</i>                                  | 5399(5.0%)   | 4948(4.9%)   |                  |
| <i>Missing</i>                               | 9669(9.0%)   | 9272(9.3%)   |                  |
| Social interaction                           |              |              | <b>&lt;0.001</b> |
| <i>Low</i>                                   | 15450(14.4%) | 16457(16.4%) |                  |
| <i>Moderate</i>                              | 58425(54.4%) | 52118(52.0%) |                  |
| <i>High</i>                                  | 23536(21.9%) | 22222(22.2%) |                  |
| <i>Missing</i>                               | 10016(9.3%)  | 9349(9.3%)   |                  |

<sup>a</sup>All P values were calculated using a t-test for continuous variables and the  $\chi^2$  test for categorical variables. Boldface indicates statistical significance, deemed as  $p < 0.05$ .

**Supplementary Figure 1** Framework of the external validation (sensitivity analysis by treating city as training set and regional/rural as validation set).

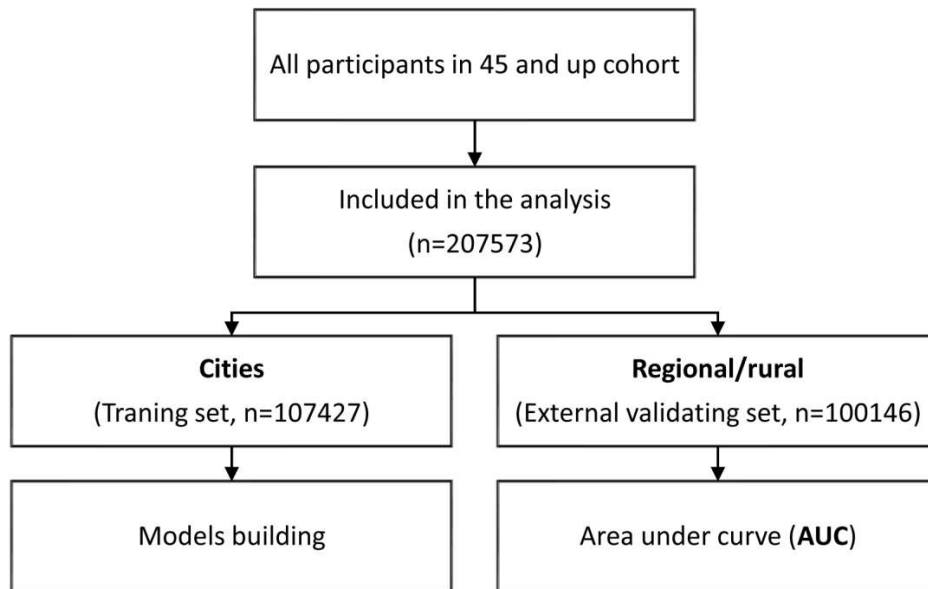

**Supplementary Figure 2** Selection process of eligible participants. BL = baseline; FU = during follow-up

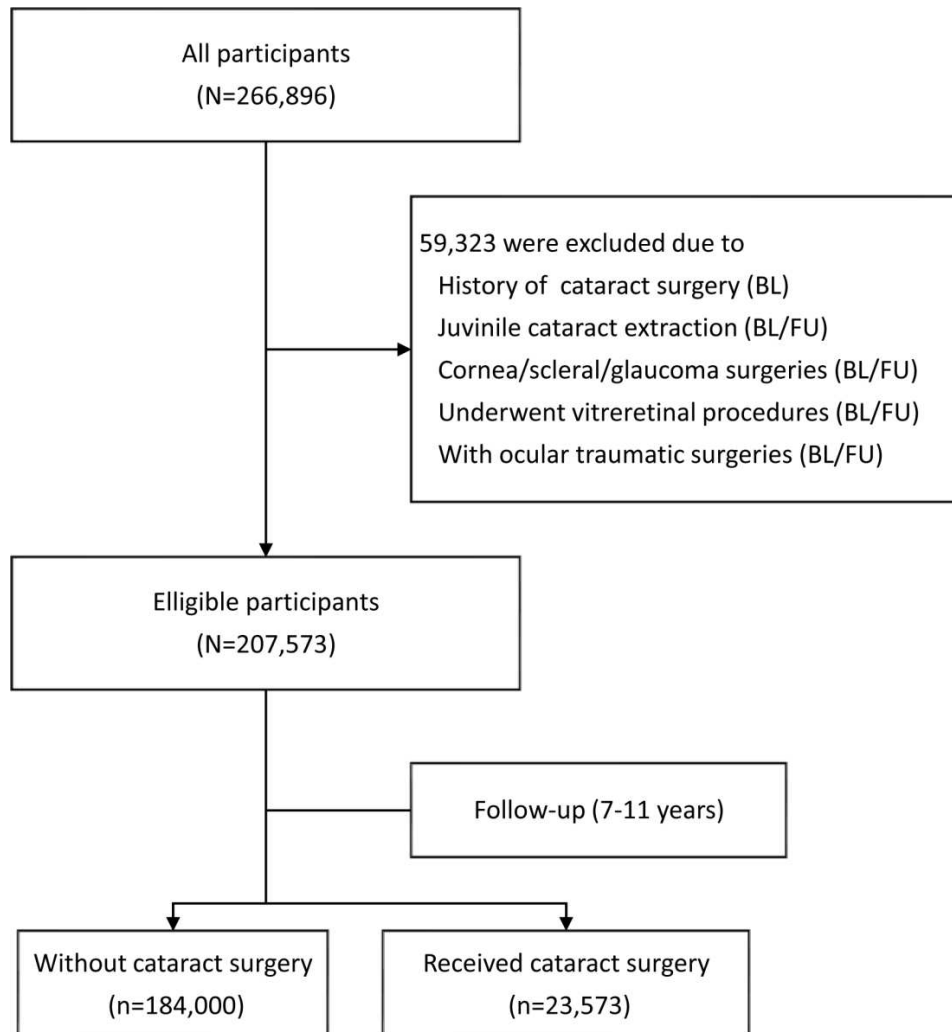

**Supplementary Figure 3** Relative importance of top 10 leading predictors for each predictive model.

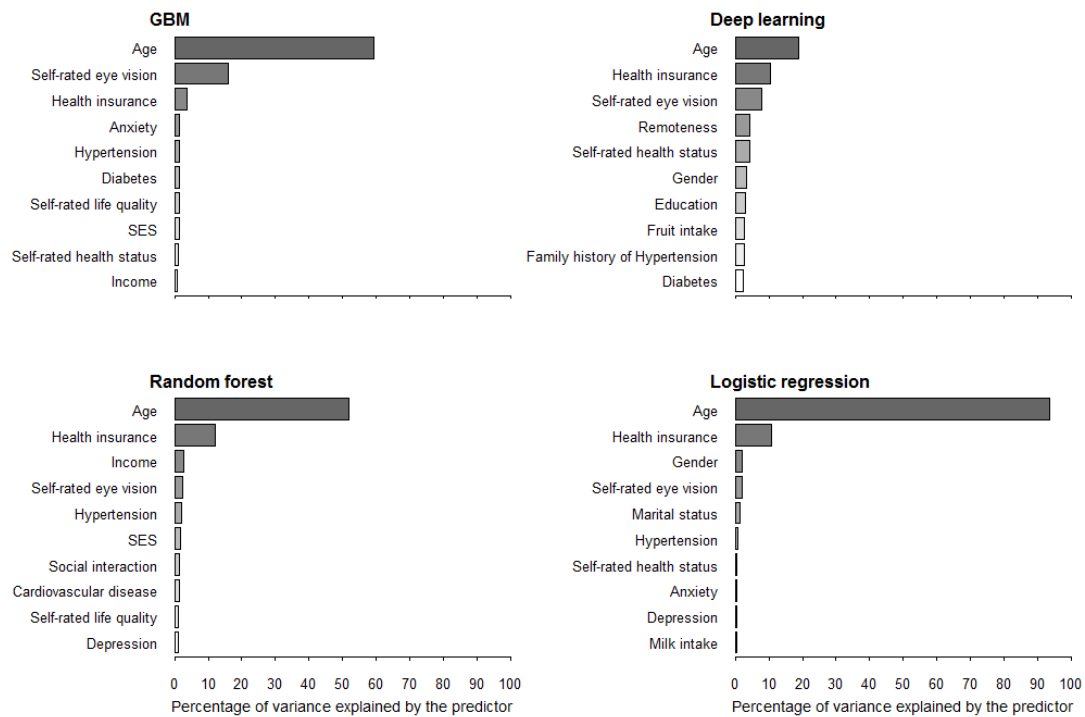

Supplement: bjophthalmol-2020-318609supp001.pdf [file bjophthalmol-2020-318609supp001.pdf]
